# Supplementary material for: The changes of clinical and histological characteristics of chronic rhinosinusitis in 18 years: Was there an inflammatory pattern shift in southern China?
Source: PubMed Central journal article supplement — World Allergy Organ J. 2021 Apr 16;14(4):100531. doi: 10.1016/j.waojou.2021.100531 (PMC8080070; doi:10.1016/j.waojou.2021.100531), 2021-04-16

**Table S1. Changes in the histological characteristics**

| <b>Histological parameter, Median (IQR)</b> | <b>Group A:2000-2001 (n=27)</b> | <b>Group B:2010-2011 (n=71)</b> | <b>Group C:2017-2018 (n=83)</b> | <b>P value</b> |
|---------------------------------------------|---------------------------------|---------------------------------|---------------------------------|----------------|
| <b>Eosinophil count/HPF</b>                 | 3.40<br>(1.0-26.20)             | 4.60<br>(1.2-20.80)             | 11.20<br>(2.9-38.25)            | 0.02*          |
| <b>Eosinophil percentage</b>                | 0.03<br>(0.007-0.16)            | 0.04<br>(0.008-0.25)            | 0.12<br>(0.030-0.3)             | <0.01**        |
| <b>Neutrophil count/HPF</b>                 | 6.60<br>(1.80-14.00)            | 2.80<br>(1.00-8.20)             | 2.00<br>(0.40-7.40)             | 0.01**         |
| <b>Neutrophil percentage</b>                | 0.042<br>(0.013-0.10)           | 0.030<br>(0.01-0.056)           | 0.023<br>(0.003-0.067)          | 0.14           |
| <b>Lymphocyte count/HPF</b>                 | 88.00<br>(55.40-115.00)         | 74.00<br>(49.00-117.40)         | 55.20<br>(24.00-100.20)         | <0.01**        |
| <b>Lymphocyte percentage</b>                | 0.64<br>(0.52-0.74)             | 0.72<br>(0.29-0.82)             | 0.56<br>(0.39-0.74)             | <0.001***      |
| <b>Plasmocyte count/HPF</b>                 | 21.40<br>(13.20-32.80)          | 13.40<br>(7.60-26.60)           | 12.25<br>(6.25-24.00)           | <0.05*         |
| <b>Plasmocyte percentage</b>                | 0.13<br>(0.09-0.24)             | 0.13<br>(0.09-0.21)             | 0.14<br>(0.07-0.23)             | 0.86           |
| <b>Total inflammatory cell count/HPF</b>    | 158.80<br>(102.00-181.20)       | 114.20<br>(79.2-154.80)         | 112.40<br>(66.75-159.80)        | 0.02*          |

\*  $P < 0.05$ , \*\*  $P < 0.01$ , \*\*\*  $P < 0.001$ , IQR, Interquartile range, HPF, High power field

**Table S2. Changes in the clinical and histological characteristics of NAR-AS**

**patients over 18 years**

|                                                | NAR-AS                   |                        |                        | P (Group A VS B)      | P (Group B VS C)    | P (Group A VS C)      |
|------------------------------------------------|--------------------------|------------------------|------------------------|-----------------------|---------------------|-----------------------|
|                                                | Group A:2000-2001        | Group B:2010-2011      | Group C:2017-2018      |                       |                     |                       |
| <b>Subjects, n</b>                             | 81                       | 135                    | 152                    | /                     | /                   | /                     |
| <b>Smoking, n</b>                              | 42(51.85)                | 30(22.22)              | 19(12.5)               | <0.001 <sup>***</sup> | 0.029 <sup>*</sup>  | <0.001 <sup>***</sup> |
| <b>Revision surgery patients, n (%)</b>        | 49(60.49)                | 34(25.19)              | 22(14.47)              | <0.001 <sup>***</sup> | 0.022 <sup>*</sup>  | <0.001 <sup>***</sup> |
| <b>Symptom, n (%)</b>                          |                          |                        |                        |                       |                     |                       |
| <b>Nasal obstruction</b>                       | 81(100)                  | 132(97.78)             | 150(98.68)             | 0.12                  | 0.67                | 0.54                  |
| <b>Rhinorrhea</b>                              | 80(98.77)                | 126(93.33)             | 141(92.76)             | 0.094                 | 0.85                | 0.062                 |
| <b>Purulent nasal drainage</b>                 | 4(4.94)                  | 9(6.67)                | 7(4.61)                | 0.77                  | 0.45                | 1.00                  |
| <b>Head/Facial pain</b>                        | 40(49.38)                | 45(33.33)              | 29(19.08)              | 0.019 <sup>*</sup>    | 0.006 <sup>**</sup> | <0.001 <sup>***</sup> |
| <b>Sneezing</b>                                | 16(19.75)                | 22(16.30)              | 25(16.45)              | 0.52                  | 0.97                | 0.53                  |
| <b>Loss of smell</b>                           | 48(59.26)                | 80(59.26)              | 102(67.11)             | 1.0                   | 0.17                | 0.23                  |
| <b>Blood inflammatory cells, median (IQR)</b>  |                          |                        |                        |                       |                     |                       |
| <b>Eosinophil percentage (%)</b>               | 0.024<br>(0.013,0.045)   | 0.026<br>(0.011,0.049) | 0.028<br>(0.014,0.052) | 0.28                  | 0.24                | 0.81                  |
| <b>Eosinophil absolute number</b>              | 0.16<br>(0.08,0.28)      | 0.20<br>(0.073,0.32)   | 0.20<br>(0.10,0.37)    | 0.26                  | 0.20                | 0.79                  |
| <b>Neutrophil percentage (%)</b>               | 0.57<br>(0.49,0.63)      | 0.53<br>(0.47,0.62)    | 0.55<br>(0.51,0.62)    | 0.16                  | 0.39                | 0.084                 |
| <b>Neutrophil absolute number</b>              | 3.82<br>(2.85,5.07)      | 3.63<br>(2.91,4.82)    | 3.99<br>(3.13,4.96)    | 0.25                  | 0.50                | 0.79                  |
| <b>Tissue inflammatory cells, median (IQR)</b> |                          |                        |                        |                       |                     |                       |
| <b>Eosinophil/HPF</b>                          | 2.80<br>(1.10,8.10)      | 3.4<br>(1.05,15.65)    | 7.0<br>(2.33,30.80)    | 0.58                  | 0.094               | 0.067                 |
| <b>Eosinophil %</b>                            | 0.020<br>(0.007,0.073)   | 0.039<br>(0.0081,0.22) | 0.087<br>(0.016,0.31)  | 0.34                  | 0.11                | 0.03 <sup>*</sup>     |
| <b>Neutrophil /HPF</b>                         | 7.00<br>(2.40,13.30)     | 2.6<br>(0.80,6.15)     | 3.0<br>(0.60,9.40)     | 0.0042 <sup>**</sup>  | 0.64                | 0.014 <sup>*</sup>    |
| <b>Neutrophil %</b>                            | 0.076<br>(0.018,0.098)   | 0.03<br>(0.009,0.52)   | 0.04<br>(0.007,0.09)   | 0.11                  | >0.99               | 0.37                  |
| <b>Lymphocyte /HPF</b>                         | 91.40<br>(70.60,113.6)   | 67.10<br>(49.05,103.6) | 64.00<br>(30.70,108.2) | 0.11                  | 0.48                | 0.033 <sup>*</sup>    |
| <b>Lymphocyte %</b>                            | 0.66<br>(0.56,0.74)      | 0.72<br>(0.58,0.82)    | 0.59<br>(0.46,0.77)    | 0.38                  | 0.024 <sup>*</sup>  | 0.38                  |
| <b>Plasmocyte /HPF</b>                         | 22.20<br>(13.50,33.40)   | 13.70<br>(7.90,26.55)  | 11.2<br>(0(4.90,24.33) | 0.048 <sup>*</sup>    | 0.45                | 0.012 <sup>*</sup>    |
| <b>Plasmocyte %</b>                            | 0.17<br>(0.10,0.25)      | 0.14<br>(0.1,0.22)     | 0.1<br>(0.05,0.23)     | 0.42                  | 0.29                | 0.11                  |
| <b>Total inflammatory cell /HPF</b>            | 156.80<br>(101.4,174.70) | 107.4<br>(78.75,141.4) | 122.8<br>(77.60,178)   | 0.016 <sup>*</sup>    | 0.37                | 0.10                  |

\* P<0.05, \*\* P <0.01, \*\*\* P<0.001, IQR, Interquartile range, HPF, High power field

Figure S1 The Relationship between BMI and Tissue eosinophil percentage

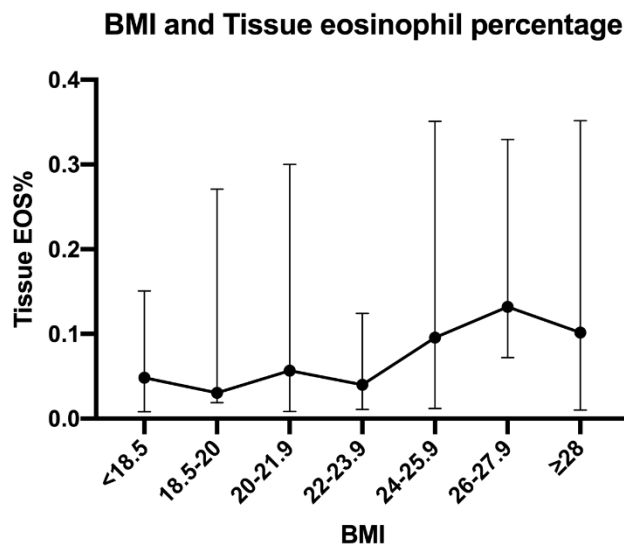

Supplement: mmc1.pdf [file mmc1.pdf]
